# Supplementary material for: Characterization of Silver Carbonate Nanoparticles Biosynthesized Using Marine Actinobacteria and Exploring of Their Antimicrobial and Antibiofilm Activity
Source: MDPI journal article supplement (doi:10.3390/md21100536), 2023-10-13
Supplement: s1 [file s1]

## Supplementary Material

# Characterization of Silver Carbonate Nanoparticles Biosynthesized using Marine *Actinobacteria* and Exploring of their Antimicrobial and Antibiofilm Activity

Omar Messaoudi <sup>1,2,\*</sup>, Ibrahim Benamar <sup>1,2</sup>, Ahmed Azizi <sup>3</sup>, Salim Albukhaty <sup>4,5,\*</sup>, Yasmina Khane <sup>6</sup>, Ghassan M. Sulaiman <sup>7,\*</sup>, Mounir M. Salem-Bekhit <sup>8,\*</sup>, Kaouthar Hamdi <sup>1</sup>, Sirine Ghoummid <sup>1</sup>, Abdelhalim Zoukel <sup>9,10</sup>, Ilhem Messahli <sup>1</sup>, Yacine Kerchich <sup>11</sup>, Farouk Benaceur <sup>1,12</sup>, Mohamed M. Salem <sup>13</sup> and Mourad Bendahou <sup>2</sup>

<sup>1</sup> Department of Biology, Faculty of Science, University of Amar Telidji, Laghouat 03000, Algeria; ib.benamar@lagh-univ.dz (I.B.); k.hamdi.bio@lagh-univ.dz (K.H.); goudidsirine@gmail.com (S.G.); messahli.ilhem@gmail.com (I.M.); f.benaceur@lagh-univ.dz (F.B.)

<sup>2</sup> Laboratory of Applied Microbiology in Food and Environment, Abou Bekr Belkaid University, Tlemcen 13000, Algeria; bendahou63@yahoo.fr

<sup>3</sup> Department of The Common Trunk Sciences and Technology, Faculty of Technology, University of Amar Telidji, Highway Ghardaia, P.O. Box G37 (M'kam), Laghouat 03000, Algeria; a.azizi@lagh-univ.dz

<sup>4</sup> Department of Chemistry, College of Science, University of Misan, Maysan 62001, Iraq

<sup>5</sup> College of Medicine, University of Warith Al-Anbiyaa, Karbala, 56001, Iraq

<sup>6</sup> Faculty of Science and Technology, University of Ghardaia, BP455, Ghardaia 47000, Algeria; yasminekhane@yahoo.fr

<sup>7</sup> Division of Biotechnology, Department of Applied Sciences, University of Technology, Baghdad 10066, Iraq

<sup>8</sup> Department of Pharmaceuticals, College of Pharmacy, King Saud University, P.O. Box 2457, Riyadh 11451, Saudi Arabia

<sup>9</sup> Laboratory Physico-Chemistry of Materials, Laghouat University, Laghouat 03000, Algeria; abdelhalim.zoukel@gmail.com

<sup>10</sup> Center for Scientific and Technical Research in Physicochemical Analysis (PTAPC-Laghouat-CRAPC), Laghouat 03000, Algeria

<sup>11</sup> École Nationale Polytechnique (ENP), Laboratory of Environmental Science and Technology El Harrach 16200, Algeria; yacine.kerchich@g.enp.edu.dz

<sup>12</sup> Research Unit of Medicinal Plant (RUMP) Attached to Center of Biotechnology (CRBt, 3000, Constantine), Laghouat 03000, Algeria

<sup>13</sup> Huazhong University of Science and Technology, Wuhan, 430030, China; medozcockney@gmail.com

\* Correspondence: o.messaoudi@lagh-univ.dz (O.M.); albukhaty.salim@uomisan.edu.iq (S.A.); ghassan.m.sulaiman@uotechnology.edu.iq (G.M.S.); mbekhet@ksu.edu.sa (M.M.S.-B.)

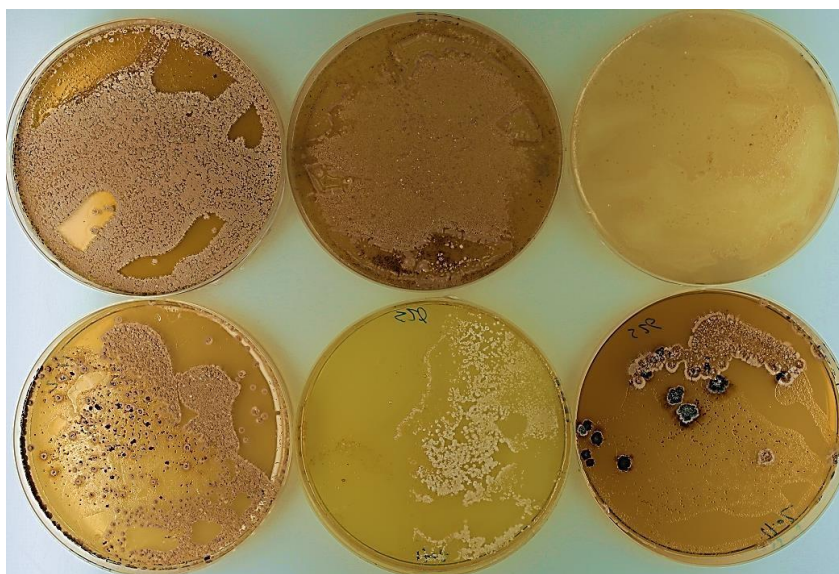

A

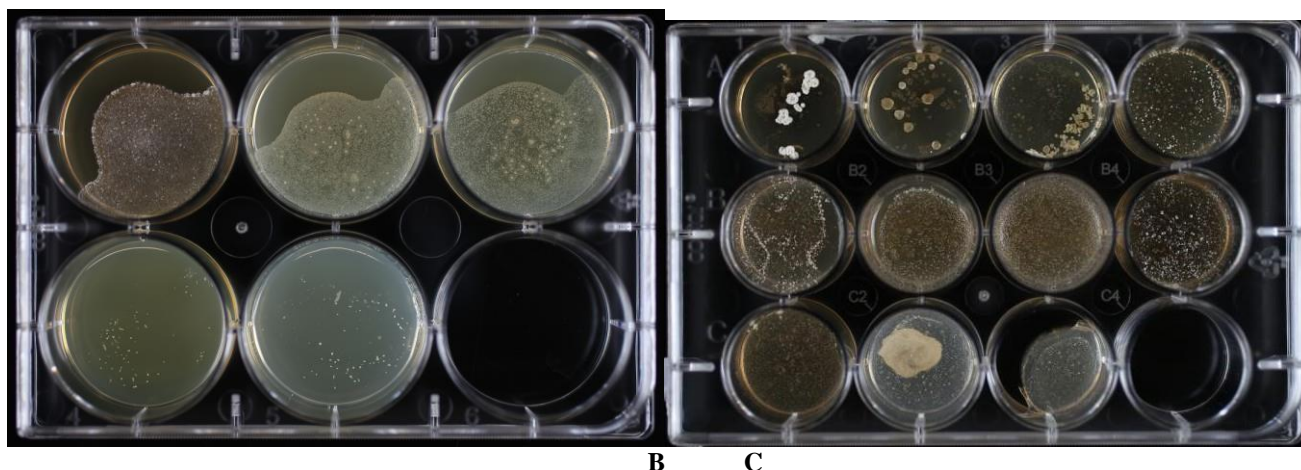

Figure S1. **A.** Colony description and melanin pigment formation; from top left to bottom right: ISP2, ISP3, ISP4, ISP5, ISP6, and ISP7. **B.** Sodium chloride tolerance test; [NaCl] from top left to bottom right : 0%, 2.5%, 5%, 7.5%, 10%. **C.** Carbon utilization test; from top left to bottom right: glucose, arabinose, sucrose, xylose, inositol, mannose, fructose, rhamnose, raffinose, cellulose, water).

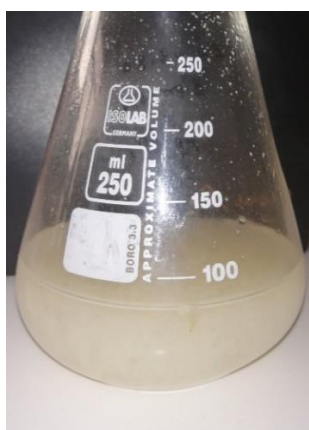

After the addition of AgNO<sub>3</sub> to the biomass of strain S26

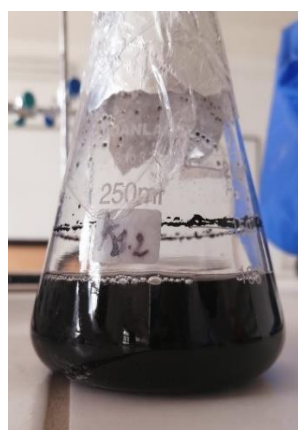

Before the addition of AgNO<sub>3</sub> to the biomass of strain S26

**Figure S2.** Biosynthesis of silver carbonate nanoparticles by the biomass of *Saccharopolyspora erythraea* S26 strain.

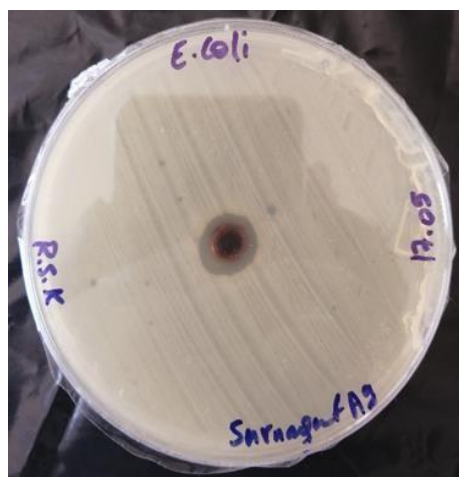

*Escherichia coli* (ATCC 25922)

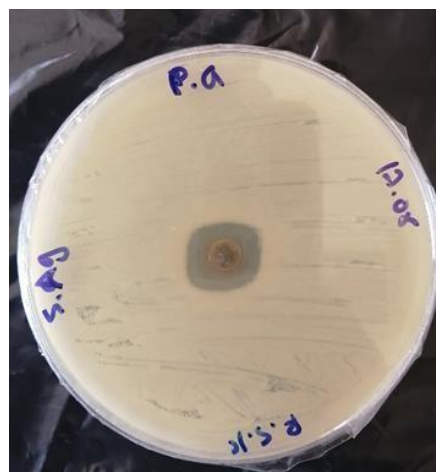

*Pseudomonas aeruginosa* (ATCC 19606)

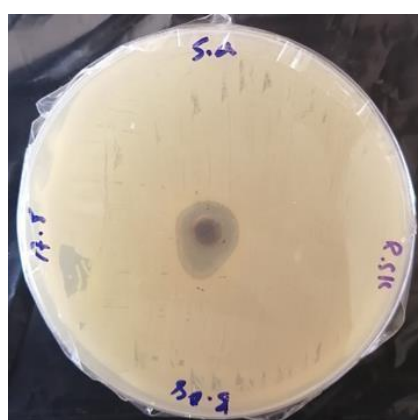

*Staphylococcus aureus* (ATCC 25923)

**Figure S3.** Antimicrobial activity of silver carbonate nanoparticles prepared from the biomass of strain *Saccharopolyspora erythraea* S26.

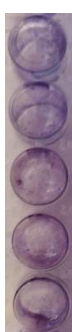

BioAg<sub>2</sub>CO<sub>3</sub>NPs

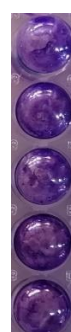

Negative control

**Figure S4.** Microtiter plate biofilm assay for the evaluation of the antibiofilm activity of Bio-Ag<sub>2</sub>CO<sub>3</sub>NPs against the biofilm formed by strain *Klebsiella pneumoniae* kp6 strain

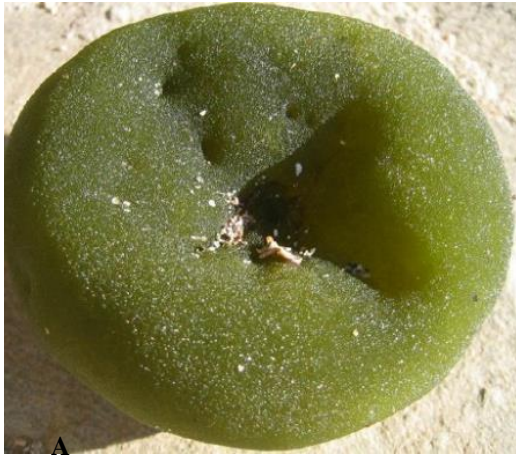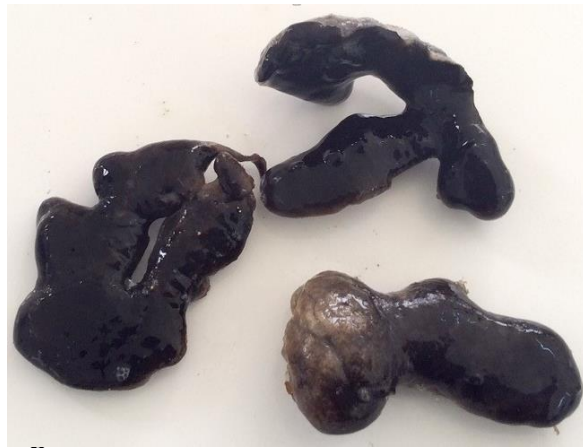

Figure S5. Marine samples used for Actinobacteria isolation. A : Marine algae *Codium bursa*; B : Marine sponge *Chondrosia reniformis*.

**Table S1.** Antimicrobial activity (mm) of *Actinobacteria* strains against different pathogenic microorganisms.

| Origine of isolates | Isolates | <i>E. coli</i> | <i>K. pneumoniae</i> | <i>P. aeruginosa</i> | <i>S. aureus</i> | <i>M. luteus</i> | <i>B. cereus</i> | <i>L. monocytogenes</i> | <i>C. albicans</i> |
|---------------------|----------|----------------|----------------------|----------------------|------------------|------------------|------------------|-------------------------|--------------------|
| Marine sediment     | M51      | -              | 8                    | -                    | -                | -                | 21               | -                       | 15                 |
|                     | M52      | -              | -                    | -                    | -                | 16               | -                | -                       | 8.5                |
|                     | BS4      | -              | -                    | -                    | -                | 8.5              | -                | -                       | -                  |
|                     | BC8      | -              | -                    | -                    | 8                | -                | -                | -                       | -                  |
|                     | M2S9     | -              | -                    | 8                    | -                | -                | -                | -                       | -                  |
|                     | M2S10    | -              | -                    | -                    | -                | -                | 17               | -                       | 14                 |
|                     | M2S12    | -              | -                    | -                    | 12               | -                | -                | -                       | -                  |
|                     | M19      | -              | -                    | -                    | 11               | -                | -                | -                       | -                  |
|                     | MHB2     | -              | -                    | -                    | 9                | 10               | -                | -                       | 9                  |
|                     | RHS22    | -              | -                    | -                    | -                | -                | -                | -                       | 10                 |
|                     | S26      | -              | -                    | -                    | 31               | 21.5             | 29               | -                       | 20.5               |
|                     | M2S27    | -              | -                    | -                    | -                | -                | 8                | -                       | -                  |
|                     | M2S28    | -              | -                    | -                    | -                | -                | 12               | -                       | 12                 |
|                     | M29      | -              | -                    | -                    | 11               | -                | 9                | -                       | 10                 |
|                     | M2S30    | -              | -                    | -                    | 12.5             | -                | -                | -                       | 11                 |
|                     | M5S34    | -              | -                    | -                    | -                | 9.5              | -                | -                       | 8.5                |
|                     | CS3      | -              | -                    | -                    | -                | -                | 13               | -                       | -                  |
|                     | CC54     | -              | -                    | -                    | -                | 15.5             | -                | -                       | -                  |
|                     | RR56     | -              | -                    | -                    | 16               | -                | 12               | -                       | 12.5               |
|                     | RR57     | -              | -                    | -                    | 8                | -                | 15               | -                       | 19                 |
|                     | M2S59    | -              | -                    | -                    | -                | -                | 9                | -                       | 11                 |
|                     | MRH94    | -              | -                    | -                    | 30               | 29.5             | 28.5             | -                       | 21.5               |
|                     | M2S108   | -              | -                    | -                    | -                | -                | -                | -                       | 10.5               |
|                     | CS114    | -              | -                    | -                    | -                | 19               | -                | -                       | -                  |
|                     | M2S115   | -              | -                    | -                    | -                | -                | 13               | -                       | 14                 |
|                     | MS44     | -              | -                    | -                    | 20.5             | -                | 12               | -                       | 19                 |
|                     | M2C6     | -              | -                    | -                    | -                | -                | 16               | -                       | -                  |
|                     | CS7      | -              | -                    | -                    | 8.5              | -                | -                | -                       | -                  |
|                     | CS16     | -              | -                    | -                    | -                | -                | 10               | -                       | -                  |
|                     | CS58     | 22             | -                    | -                    | -                | 27               | -                | -                       | 20                 |
| Marine algae        | SW1V5    | -              | -                    | -                    | -                | -                | -                | -                       | 13.5               |
|                     | W7V9     | -              | -                    | 9                    | -                | -                | -                | -                       | 11.5               |
|                     | W3V10    | -              | -                    | 10                   | 9                | -                | -                | -                       | 11                 |
|                     | W4V12    | 13.5           | 16.5                 | 11                   | 18.75            | 15.75            | 13               | 13.5                    | 20                 |
|                     | V4       | -              | -                    | -                    | -                | -                | -                | -                       | 11.25              |
|                     | S17      | -              | -                    | -                    | 11.5             | -                | 13               | -                       | -                  |
|                     | W6V18    | -              | -                    | -                    | 7.5              | -                | -                | -                       | 7                  |
| Marine sponge       | SA6M7    | -              | -                    | 10                   | -                | -                | -                | -                       | -                  |
|                     | A6M14    | -              | -                    | -                    | 8.75             | -                | -                | -                       | 7                  |
|                     | S23      | -              | -                    | -                    | 14               | -                | 9                | -                       | 13                 |

Table S2. Molecular identification of the 18 selected active strains, based on 16S rRNA gene sequencing.

| Isolates                                                                               | Clusters           | Closest reference species                                                                                                                                                                                                                                                                                                                                                | Similarity (%)                                                                              |
|----------------------------------------------------------------------------------------|--------------------|--------------------------------------------------------------------------------------------------------------------------------------------------------------------------------------------------------------------------------------------------------------------------------------------------------------------------------------------------------------------------|---------------------------------------------------------------------------------------------|
| S17<br>MRH94<br>MS44<br>M29<br>M2S28<br>W3V10<br>W4V12<br>W7V9<br>M51<br>MHB2<br>W6V18 | <b>Cluster I</b>   | <i>Streptomyces spinoverrucosus</i><br><i>Streptomyces luridiscabiei</i> <i>Streptomyces hydrogenans</i> <i>Streptomyces artemisiae</i> <i>Streptomyces peucetius</i> <i>Streptomyces albobogriseolus</i> <i>Streptomyces lavendofoliae</i> <i>Streptomyces pactum</i> <i>Streptomyces hydrogenans</i> <i>Streptomyces qinglanensis</i> <i>Streptomyces qinglanensis</i> | 99.72<br>99.86<br>99.46<br>99.65<br>99.72<br>100<br>99.88<br>100<br>99.49<br>99.67<br>99.25 |
| CS58<br>RR56<br>M52<br>RR57<br>S23<br>M2S10                                            | <b>Cluster II</b>  | <i>Nocardiopsis terrae</i><br><i>Nocardiopsis terrae</i><br><i>Nocardiopsis halotolerans</i><br><i>Nocardiopsis sinuspersici</i><br><i>Nocardiopsis dassonvillei</i> subsp. <i>dassonvillei</i><br><i>Nocardiopsis synnemataformans</i>                                                                                                                                  | 99.72<br>99.65<br>100<br>99.46<br>99.74<br>99.89                                            |
| S26                                                                                    | <b>Cluster III</b> | <i>Saccharopolyspora erythraea</i>                                                                                                                                                                                                                                                                                                                                       | 99.87                                                                                       |

**Table S3.** Characteristics of the S26 strain and the closest species within the genus *Saccharopolyspora*. 1. S26 ; 2. *Saccharopolyspora erythrea* DSM 40517<sup>T</sup> (AM420293). 3. *Saccharopolyspora spinosporotrichia* DSM 44350<sup>T</sup> ( Y09571).

| Characters                           | 1                | 2                | 3                |
|--------------------------------------|------------------|------------------|------------------|
| <b>Spores arrangement</b>            | Open spirals     | Open spirals     | Spirals          |
| <b>Spores ornamentation</b>          | Spiny            | Spiny            | Spiny            |
| <b>Substrate mycelium</b>            | Branched         | Branched         | Fragmented       |
| <b>Color</b>                         |                  |                  |                  |
| Substrate mycelium                   | Brown beige      | Bright red       | Beige            |
| Aerial mycelium                      | Beige            | White rose       | White            |
| Soluble pigment                      | Orange-brown     |                  | Pastel yellow    |
| <b>Growth on sole carbon sources</b> |                  |                  |                  |
| Glucose                              | +                | +                | +                |
| Arabinose                            | +                | +                | +                |
| Saccharose                           | +                | +                | +                |
| Xylose                               | +                | +                | +                |
| Inositol                             | +                | +                | +                |
| Mannose                              | +                | +                | +                |
| Fructose                             | +                | +                | +                |
| Rhamnose                             | +                | +                | +                |
| Raffinose                            | -                | +                | +                |
| Cellulose                            | -                | +                | +                |
| <b>NaCl tolerance</b>                | (0 - 5)%, Opt 0% | (0 - 5)%, Opt 0% | (0 - 7)%, Opt 0% |
| <b>Nitrate reductase</b>             | -                | +                | -                |
| <b>Ureas</b>                         | +                | +                | +                |



Table S4. Peak list of silver carbonate nanoparticles biosynthesis using the biomass strain S26.

| Pos. [°2 $\theta$ ] | Height [cts] | FWHM Left [°2 $\theta$ ] | d-spacing [Å] | Rel. Int. [%] |
|---------------------|--------------|--------------------------|---------------|---------------|
| 17.6239             | 1446.11      | 0.1956                   | 5.02833       | 18.26         |
| 19.5154             | 5645.86      | 0.2075                   | 4.54503       | 71.31         |
| 30.3374             | 1502.61      | 0.8822                   | 2.94387       | 18.98         |
| 30.6912             | 2351.64      | 0.1717                   | 2.91073       | 29.70         |
| 33.8752             | 7917.86      | 0.7632                   | 2.64408       | 100.00        |
| 35.5840             | 549.53       | 0.1120                   | 2.52092       | 6.94          |
| 39.5070             | 1844.61      | 0.2524                   | 2.27917       | 23.30         |
| 43.5341             | 577.84       | 0.8319                   | 2.07721       | 7.30          |
| 48.5342             | 1515.54      | 0.7830                   | 1.87425       | 19.14         |
| 53.0702             | 1022.72      | 0.2831                   | 1.72424       | 12.92         |
| 54.3468             | 459.05       | 0.3933                   | 1.68672       | 5.80          |
| 60.6894             | 1619.10      | 0.7809                   | 1.52474       | 20.45         |
| 67.2534             | 237.20       | 0.5522                   | 1.39099       | 3.00          |
| 71.5640             | 261.10       | 0.5183                   | 1.31742       | 3.30          |
